# Supplementary material for: Chromosome Level Assembly of Homozygous Inbred Line ‘Wongyo 3115’ Facilitates the Construction of a High-Density Linkage Map and Identification of QTLs Associated With Fruit Firmness in Octoploid Strawberry (Fragaria × ananassa)
Source: PubMed Central journal article supplement (PMC8317996; doi:10.3389/fpls.2021.696229), 2021-07-14
Supplement: Data_Sheet_6.pdf [file Data_Sheet_6.pdf]

**Chromosome level assembly of homozygous inbred line ‘Wongyo 3115’ facilitate the construction of high density linkage map and identification of QTLs associated with fruit firmness in octoploid strawberry (*Fragaria × ananassa*)**

**Supplementary Tables**

**Supplementary Table 1.** Summary of Illumina short read sequencing ‘Wongyo 3115’

| <b>Read Order</b> | <b>Index</b> | <b>Yield(Bases)</b> | <b>Reads</b> | <b>% of &gt;= Q30</b> | <b>Mean Quality</b> |
|-------------------|--------------|---------------------|--------------|-----------------------|---------------------|
| 1                 | CAGATC       | 17,717,438,180      | 175,420,180  | 83.67                 | 34.11               |
| 2                 | CAGATC       | 17,717,438,180      | 175,420,180  | 75.31                 | 32.33               |

**Supplementary Table 2.** Genome size estimation using JELLYFISH

| <b>k-mer</b>      | <b>17</b>      | <b>19</b>      | <b>25</b>      |
|-------------------|----------------|----------------|----------------|
| Total Nucleotides | 26,021,674,618 | 25,242,267,482 | 23,339,394,113 |
| Peak Depth        | 33             | 32             | 29             |
| Genome Size       | 788,535,594    | 788,820,859    | 804,806,694    |

**Supplementary Table 3.** Summary of PacBio filtered subreads

| <b>No. of Bases</b> | <b>No. of Reads</b> | <b>N50 Read Length</b> | <b>Mean Read Length</b> | <b>Max Read Length</b> |
|---------------------|---------------------|------------------------|-------------------------|------------------------|
| 61,006,607,136      | 4,132,073           | 23,811                 | 14,764                  | 99,891                 |

**Supplementary Table 4.** Summary of FALCON-Unzip assembly statistics.

|                           | draft       |            | unzip       |            | arrow       |            | Error correction |
|---------------------------|-------------|------------|-------------|------------|-------------|------------|------------------|
|                           | primary     | associated | primary     | haplotig   | primary     | haplotig   | Primary          |
| Number of contigs         | 1,296       | 102        | 365         | 918        | 323         | 844        | 323              |
| Total size of contigs     | 812,765,282 | 12,033,549 | 803,308,313 | 62,138,683 | 805,586,201 | 59,823,691 | 805,664,111      |
| Longest contig size       | 22,743,024  | 861,039    | 22,759,814  | 908,834    | 22,877,306  | 916,648    | 22,878,989       |
| Number of contigs > 1K nt | 1,251       | 101        | 364         | 918        | 323         | 844        | 323              |
| No. of contigs > 10K nt   | 708         | 99         | 364         | 907        | 323         | 839        | 323              |
| No. of contigs > 100K nt  | 176         | 27         | 175         | 102        | 173         | 103        | 173              |
| No. of contigs > 1M nt    | 122         | 0          | 122         | 0          | 122         | 0          | 122              |
| No. of contigs > 10M nt   | 26          | 0          | 26          | 0          | 26          | 0          | 26               |
| Mean contig size          | 627,134     | 117,976    | 2,200,845   | 67,689     | 2,494,075   | 70,881     | 2,494,316        |
| Median contig size        | 11,244      | 59,840     | 88,105      | 53,007     | 158,413     | 54,930     | 158,413          |
| N50 contig length         | 9,657,506   | 256,692    | 9,658,731   | 73,343     | 9,848,239   | 75,523     | 9,849,455        |
| L50 contig count          | 30          | 13         | 30          | 234        | 29          | 217        | 29               |
| GC Contents (%)           | 39.47       | 39.78      | 39.46       | 42.51      | 39.36       | 42.19      | 39.35            |

**Supplementary Table 5.** Dovetail-HiRise comparative assembly statistics

| Parameters                                        | Input assembly            | Dovetail HiRise assembly |
|---------------------------------------------------|---------------------------|--------------------------|
| Total Length                                      | 805.66 Mb                 | 805.68 Mb                |
| L50/N50                                           | 29 scaffolds; 9.849 Mb    | 13 scaffolds; 27.373 Mb  |
| L90/N90                                           | 89 scaffolds; 2.435 Mb    | 26 scaffolds; 21.949 Mb  |
| Longest Scaffold                                  | 22,878,989 bp             | 38,443,702 bp            |
| Number of scaffolds                               | 323                       | 208                      |
| Number of gaps                                    | 0                         | 135                      |
| Number of breaks made to input assembly by HiRise | 13                        |                          |
| Number of joins made by HiRise                    | 133                       |                          |
| Library statistic                                 | 103M read pairs; 2x151 bp |                          |

**Supplementary Table 6.** Evidence sources employed for gene prediction

| Sample Source              | Data Source | Number of Sequences |
|----------------------------|-------------|---------------------|
| ‘Wongyo 3115’              | IsoSeq      | 108,951             |
| <i>Fragaria iinumae</i>    | Protein     | 76,760              |
| <i>Fragaria nipponica</i>  | Protein     | 87,803              |
| <i>Fragaria nubicola</i>   | Protein     | 85,062              |
| <i>Fragaria orientalis</i> | Protein     | 99,674              |
| <i>Fragaria vesca</i>      | Protein     | 28,588              |

**Supplementary Table 7.** Summary of transposons identified in ‘Wongyo 3115’ genome

| Repeats        | Number of elements | Length (bp)  | Percentage of sequence (%) |
|----------------|--------------------|--------------|----------------------------|
| SINEs          | 11,672             | 15,32,580    | 0.19                       |
| LINEs          | 30,854             | 11,626,257   | 1.44                       |
| LTR elements   | 1,57,093           | 1,55,181,296 | 19.26                      |
| DNA elements   | 1,87,134           | 87,941,340   | 10.92                      |
| Unclassified   | 2,02,708           | 43,831,916   | 5.44                       |
| Small RNA      | 13,085             | 31,759,51    | 0.39                       |
| Satellites     | 1,013              | 5,42,848     | 0.07                       |
| Simple repeats | 2,05,878           | 8,72,0425    | 1.08                       |
| Low complexity | 35,429             | 1,768,696    | 0.22                       |

**Supplementary Table 8.** BUSCO analysis of strawberry genome

| BUSCO terms                     | Embryophyta (n: 1,440) | Eukryota (n: 303) |
|---------------------------------|------------------------|-------------------|
| Complete BUSCOs                 | 1,355 (94.1%)          | 274 (90.4%)       |
| Complete and single-copy BUSCOs | 111 (7.7%)             | 27 (8.9%)         |
| Complete and duplicated BUSCOs  | 1,244 (86.4%)          | 247 (81.5%)       |
| Fragmented BUSCOs               | 11 (0.8%)              | 2 (0.7%)          |

**Supplementary Table 9.** Comparison of re-sequencing mapping ratio of strawberry cultivars with ‘Wongyo 3115’ and ‘Camarosa’ reference genomes.

| Cultivars      | Re-sequencing data |                    | <sup>z</sup> Percentage of mapped reads (%) |               | <sup>y</sup> Genome coverage (%) |               |
|----------------|--------------------|--------------------|---------------------------------------------|---------------|----------------------------------|---------------|
|                | Origin             | No. of total reads | ‘Wongyo 3115’                               | ‘Camarosa’    | ‘Wongyo 3115’                    | ‘Camarosa’    |
| Chandler       | USA                | 92,994,730         | 90.05                                       | 87.84         | 92.70                            | 93.48         |
| Comet          | USA                | 97,763,002         | 89.85                                       | 87.12         | 92.29                            | 91.94         |
| Diamante       | USA                | 100,102,696        | 91.04                                       | 88.70         | 92.26                            | 93.67         |
| Elsanta        | Europe             | 95,387,670         | 88.01                                       | 85.53         | 91.84                            | 92.33         |
| Florida_belle  | USA                | 96,049,834         | 88.42                                       | 85.33         | 91.51                            | 91.77         |
| Gaviota        | Europe             | 98,395,888         | 90.44                                       | 89.17         | 92.27                            | 93.65         |
| General_Chanzy | Asia               | 93,486,600         | 90.10                                       | 87.84         | 92.42                            | 92.25         |
| Misohyang      | Asia               | 95,758,136         | 91.66                                       | 87.33         | 85.81                            | 91.26         |
| Sure_crop      | USA                | 97,045,784         | 88.51                                       | 85.86         | 93.30                            | 80.08         |
| Ventana        | USA                | 90,137,424         | 90.44                                       | 90.14         | 91.66                            | 89.70         |
| <b>Average</b> |                    | <b>95,712,176</b>  | <b>89.85%</b>                               | <b>87.49%</b> | <b>91.61%</b>                    | <b>91.01%</b> |

<sup>z</sup> Percentage of mapped reads = Number of reads mapped/ Total number of reads

<sup>y</sup> Genome coverage = Percentage of mapped region / Reference genome size

**Supplementary Table 10.** Summary of Axiom 35K markers and the filtering criteria employed for the genetic map construction.

| Filtering option                          | Number of markers |
|-------------------------------------------|-------------------|
| Raw marker                                | 37,996            |
| Polymorphic marker b/w parental lines     | 6,494             |
| Aligned to chromosome (identity > 90%)    | 5,527             |
| Segregated in F <sub>2</sub> *            |                   |
| Aligned to one chromosomal region         | 4,466             |
| Or linked to LG matched to one chromosome |                   |

\*Markers with all maternal, paternal, or heterozygous genotype were removed.

## Supplementary Figures

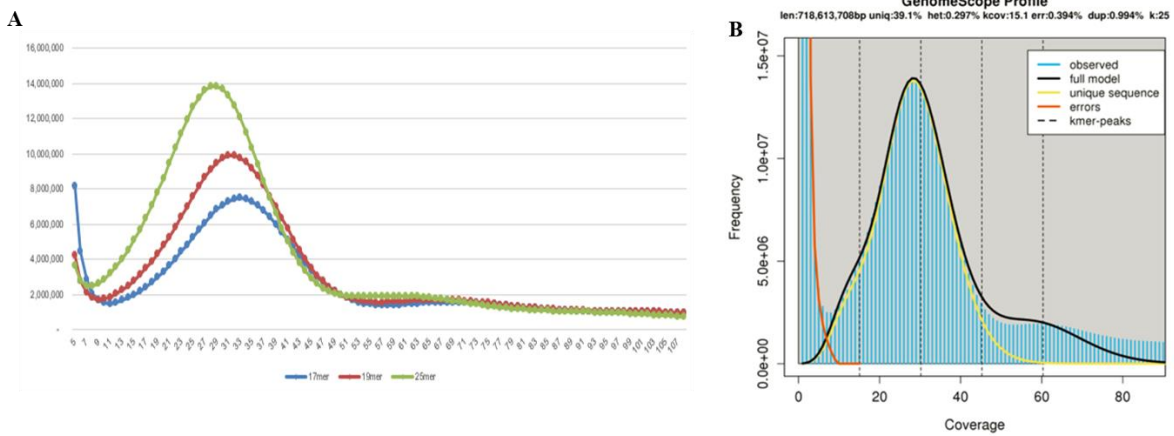

**Supplementary Fig. 1.** Estimation of genome size. A) K-mer based estimation of ‘Wongyo 3115’ genome size. B) Genome heterozygosity prediction based on GENOMESCOPE program.

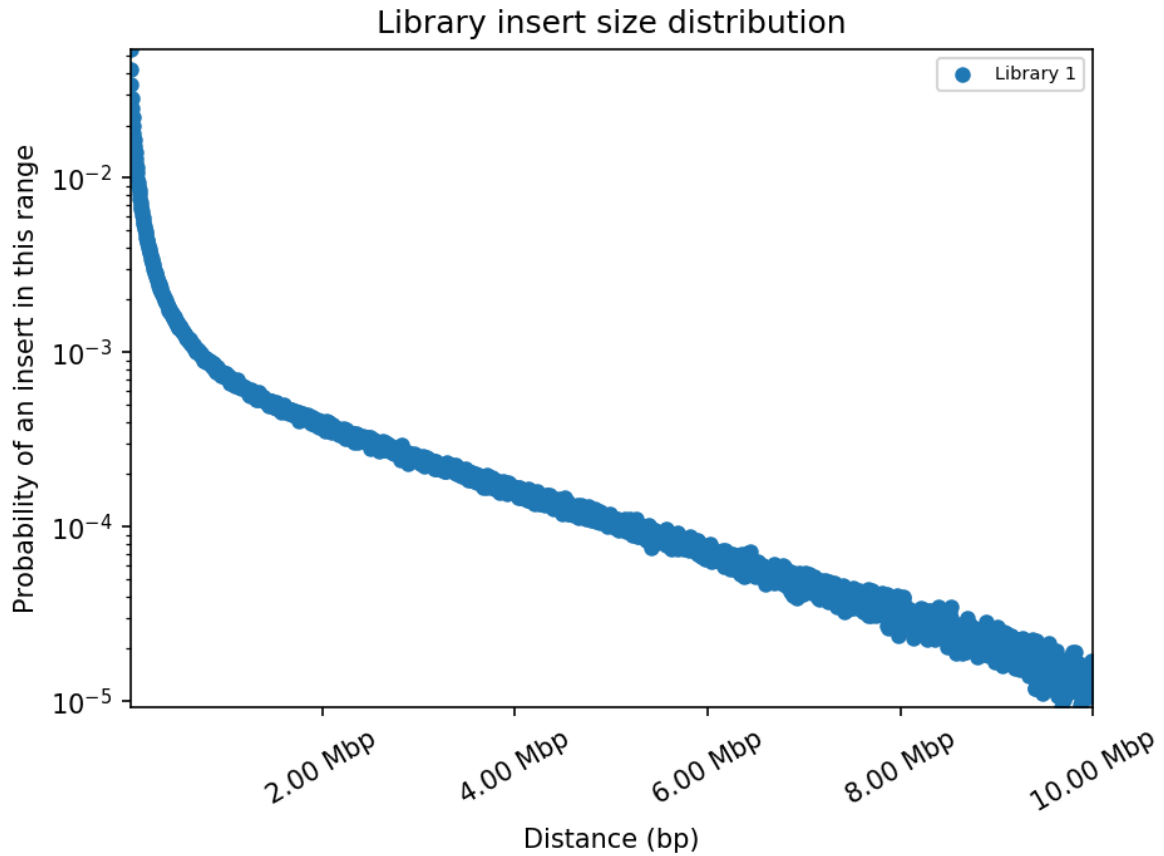

**Supplementary Fig. 2.** Distribution of insert sizes in the Dovetail library. The distance between the forward and reverse reads is given on the X-axis in basepairs, and the probability of observing a read pair with a given insert size is shown on the Y-axis.

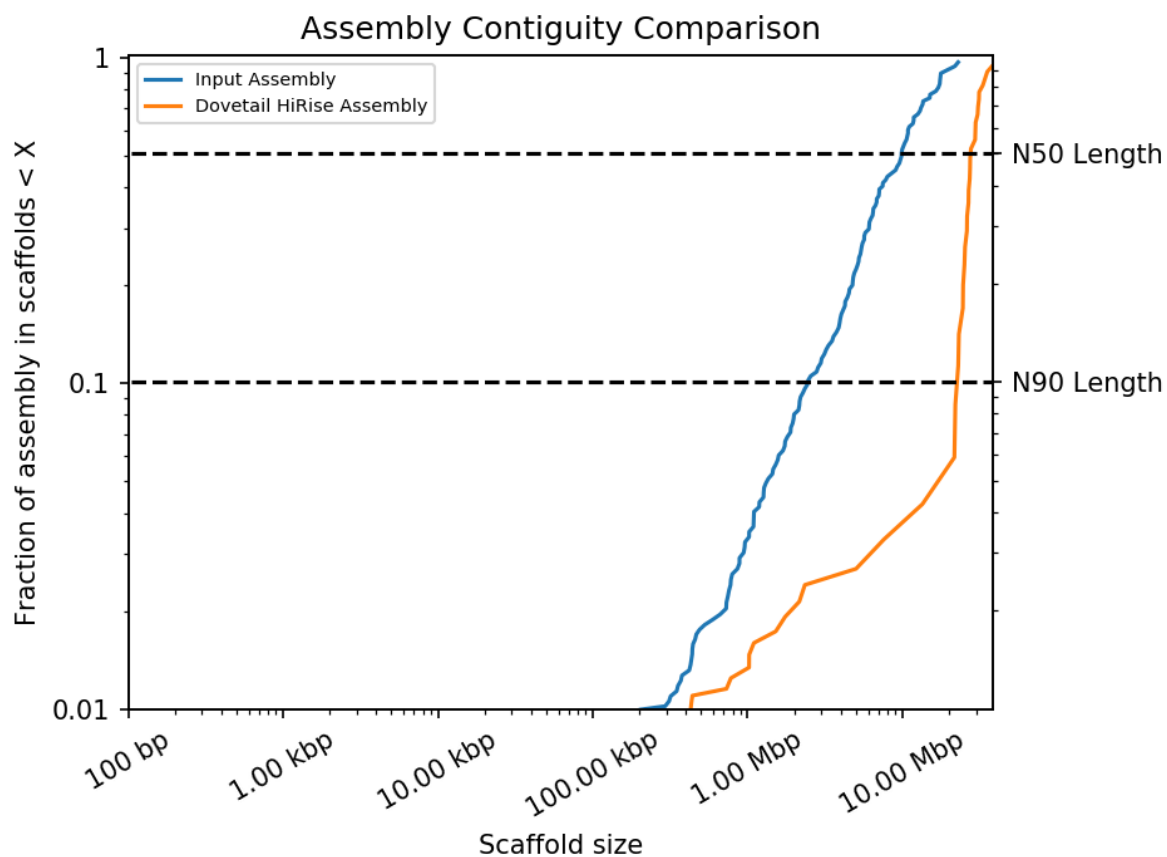

**Supplementary Fig. 3.** A comparison of the contiguity of the input assembly and the final HiRise scaffolds. Each curve shows the fraction of the total length of the assembly present in scaffolds of a given length or smaller. The fraction of the assembly is indicated on the Y-axis and the scaffold length in basepairs is given on the X-axis. The two dashed lines mark the N50 and N90 lengths of each assembly. Scaffolds less than 1 kb are excluded.

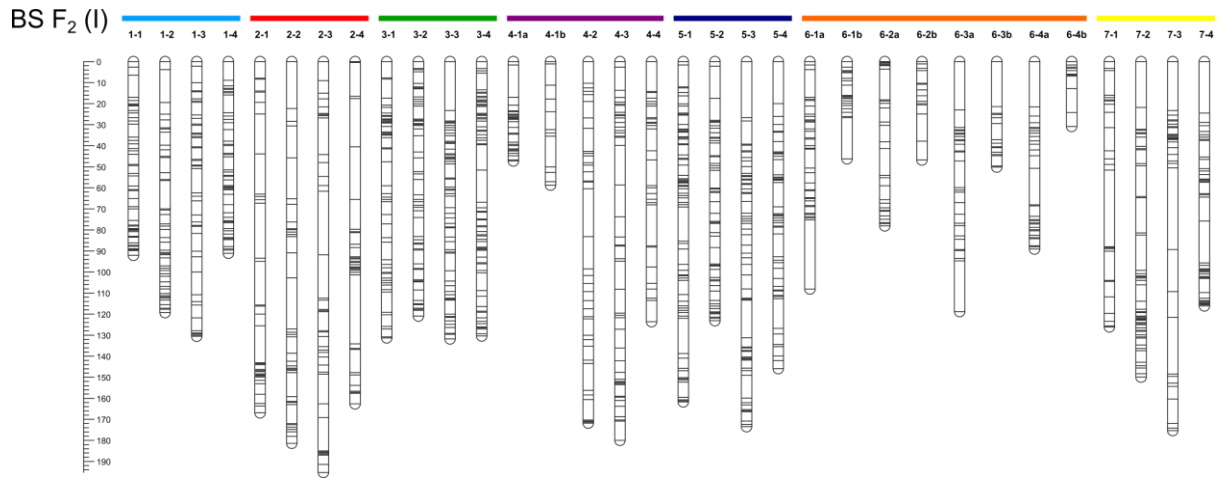

**Supplementary Fig.4.** Construction of ‘BS F<sub>2</sub> (I)’ linkage bin map. High-density linkage bin map of the ‘BS F<sub>2</sub> (I)’ population consists of GBS and Axiom 90K marker sets. Linkage groups are denoted corresponding to 28 chromosomes of ‘Wongyo 3115’. Chr4-1, 6-1, 6-2, 6-3 and 6-4 are divided into two linkage groups. The bar on the left is an indicator of the length of the linkage groups.

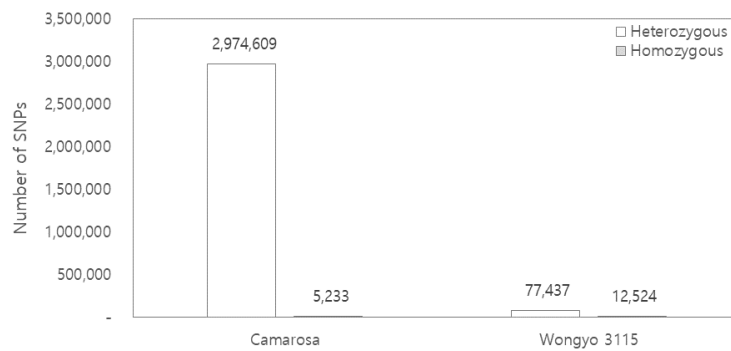

**Supplementary Fig.5.** Number of SNPs detected utilizing the Illumina sequencing data in ‘Camarosa’ and ‘Wongyo 3115’ genomes representing the high homozygosity of ‘Wongyo 3115’.

'Sulhyang' × 'Senga-sengana' (Lee et al., 2020)

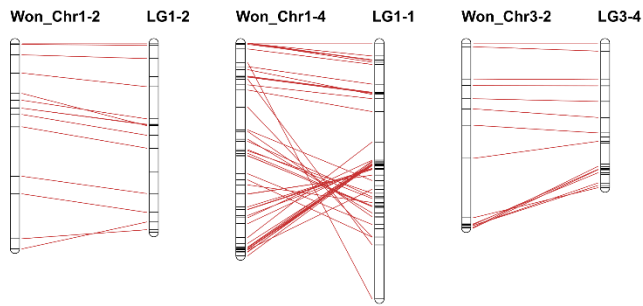

'Redgauntlet' × 'Hapil' (Alarfaj et al., 2021)

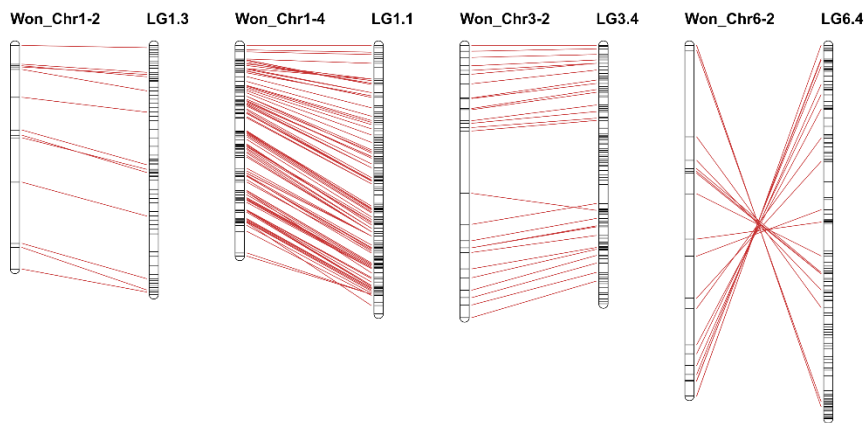

'232' × '1392' (Sánchez-Sevilla et al., 2015)

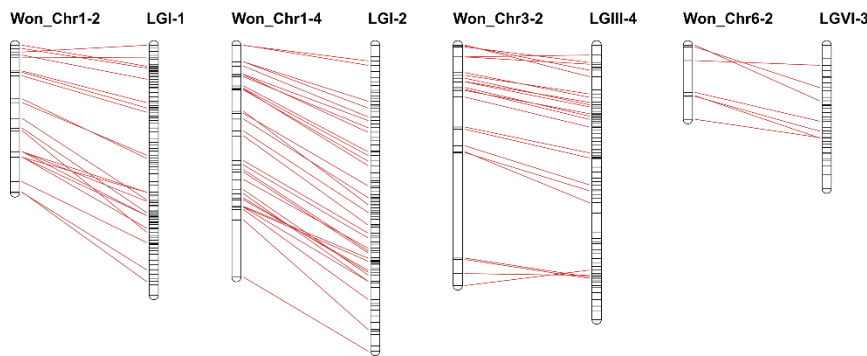

**Supplementary Fig. 6.** Comparison of previously reported genetic maps (Lee et al., 2020; Alarfaj et al., 2021; Sánchez-Sevilla et al., 2015) and physical map of chromosome 1-2, 1-4, 3-2, and 6-2 of 'Wongyo 3115'.



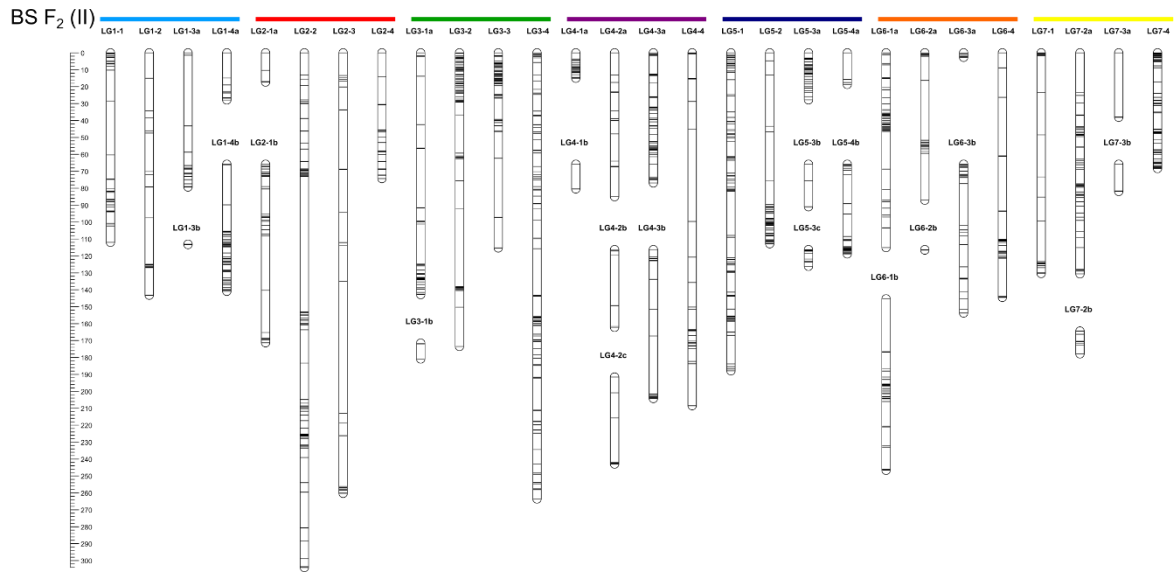

**Supplementary Fig. 7.** Linkage map of 'BS F<sub>2</sub> (II)' used for QTL analysis

| Year                    | 2004      | 2005           | 2006           | 2007           | 2008           | 2009           | 2010 - 2012    |                |                |                |                 |                               |
|-------------------------|-----------|----------------|----------------|----------------|----------------|----------------|----------------|----------------|----------------|----------------|-----------------|-------------------------------|
| Selfing generation(Sn)  | Origin    | S <sub>1</sub> | S <sub>2</sub> | S <sub>3</sub> | S <sub>4</sub> | S <sub>5</sub> | S <sub>6</sub> | S <sub>7</sub> | S <sub>8</sub> | S <sub>9</sub> | S <sub>10</sub> |                               |
|                         |           | 1              | 1              | 1              | 1              | 1              | 1              | 1              | 1              | 1              |                 |                               |
|                         |           | :              | :              | :              | :              | :              | :              | :              | :              | :              |                 |                               |
|                         | Benihoppe | 3 →            | 5 →            | 1 →<br>2 →     | 8 →<br>10 →    | 307 →<br>72 →  | 8 →<br>8 →     | 138 →<br>46 →  | 5 →<br>5 →     | 5<br>14 →      | 3               | <b>(B8-9)</b><br><b>(P69)</b> |
|                         |           | :              | :              | :              | :              | :              | :              | :              | :              | :              |                 |                               |
| (No. of breeding lines) |           | 258            | 346            | 112            | 220            | 320            | 40             | 140            | 40             | 40             | 40              |                               |

| Sn           | B  | S1 | S2 | S3 | S4 | S5 | S6 | S7 | S8 | S9-10  |
|--------------|----|----|----|----|----|----|----|----|----|--------|
| Homozygosity | 50 |    |    |    |    |    |    |    |    | 90-100 |

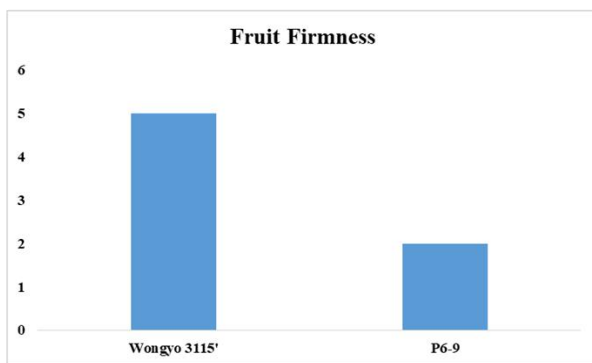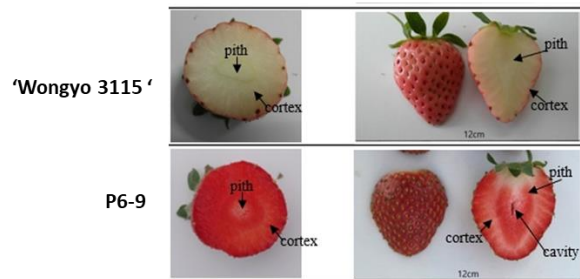

**Supplementary Fig. 8.** Pedigree and homozygosity details of ‘Wongyo 3115’ (B8-9) and ‘P69’ inbred lines along with the phenotype of fruits in ‘Wongyo 3115’ and ‘P69’ inbred lines.

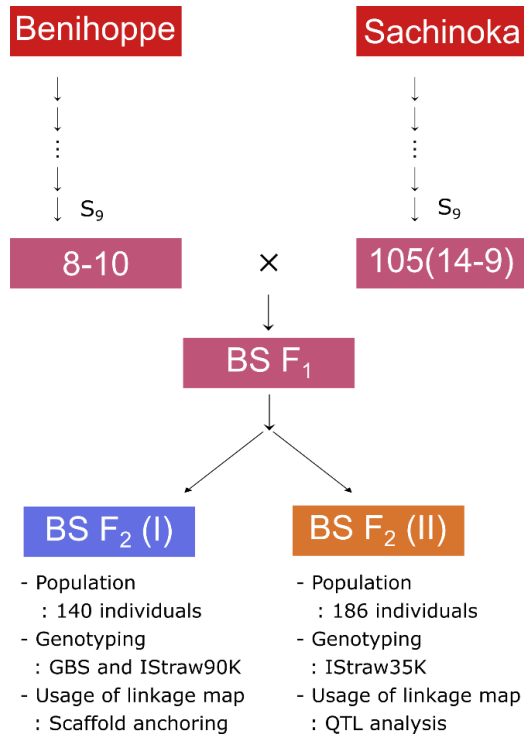

**Supplementary Fig. 9.** A pedigree diagram of two BS F<sub>2</sub> populations.
